1  
2  
3  
4  
5  
6  
7  
8  
9  
10  
11  
12  
13  
14  
15  
16  
17  
18  
19  
20  
21  
22

## Title

Habitat size, health and saturation do not alter movement decisions or the preference for familiarity in a social coral-reef fish

## Authors

Catheline Y.M. Froehlich<sup>1\*</sup>, Siobhan J. Heatwole<sup>1</sup>, O. Selma Klanten<sup>2</sup>, Marian Y.L. Wong<sup>1</sup>

<sup>1</sup>School of Earth, Atmospheric, and Life Sciences  
University of Wollongong  
Wollongong, New South Wales, 2500 Australia

<sup>2</sup>School of Life Sciences  
University of Technology Sydney  
Sydney, New South Wales, 2007, Australia

\*Corresponding author: [catheline.froehlich@gmail.com](mailto:catheline.froehlich@gmail.com)

## 23 **Abstract**

24

25 While habitat is often a limiting resource for group-living animals, we have yet to  
26 understand what aspects of habitat are particularly important for the maintenance of  
27 sociality. As anthropogenic disturbances rapidly degrade the quality of many habitats,  
28 site-attached animals are facing additional stressors that may alter the trade-offs of  
29 moving or remaining philopatric. Here we examined how **habitat health, size and**  
30 **saturation** affect movement decisions of a coral-dwelling goby, *Gobiodon*  
31 *quinquestrigatus*, that resides within bleaching-susceptible *Acropora* coral hosts. To  
32 assess effects of habitat health, we translocated individuals far from their home corals  
33 into dead corals with the choice of adjacent healthy corals. To assess effects of habitat  
34 size and saturation, we manipulated coral sizes and the number of residents in healthy  
35 corals. Remarkably, 55% of gobies returned home regardless of treatment, 7% stayed in  
36 the new coral, and the rest were not found. Contrary to expectations, habitat factors did  
37 not affect how costs of movement influence group-living decisions in this species. These  
38 site-attached fishes preferred to home instead of choosing alternative habitat, which  
39 suggests a surprising awareness of their ecological surroundings. However,  
40 disregarding alternative high-quality habitat is concerning as it may affect population  
41 persistence under conditions of rapid habitat degradation.

42

## 43 **Keywords**

44

45 Sociality, coral reef fishes, ecological constraints, costs of movement, habitat specialists,  
46 homing

47

## 48 **Background**

49

50 Social animals often live in specific microhabitats, like tunnels for mole rats, sponges for  
51 shrimp, and cnidarians for reef fishes [1–3]. For many social animals, such habitat  
52 provides access to food, mates, territory and breeding sites [4–6], and therefore  
53 represents a key limiting resource [1–3]. As such, habitat can play a key role in the  
54 evolution and maintenance of sociality, and habitat factors are known to modulate  
55 decisions of many taxa to remain in groups or move to breed elsewhere [7–11].

56

57 According to the ecological constraints hypothesis [8], delaying reproduction to remain  
58 in groups outweighs moving to other habitat to breed independently due to high costs  
59 of movement and habitat saturation [7,8,11,12]. Movement imposes substantial costs  
60 because of predation risk and energy expenditure, especially if alternative habitat is  
61 already saturated, which could arise from certain life history characteristics [13].

62 Alternatively, when reproduction of low ranking individuals is suppressed, moving to  
63 less saturated habitats could mean reaching breeding positions sooner [7,14]. Hence for  
64 social animals, the trade-offs between dispersing and remaining philopatric are likely  
65 driven by both habitat saturation and costs of movement. Alternatively, the benefits of  
66 philopatry hypothesis suggests that remaining in groups enables access to high quality  
67 habitat, which can increase survival and long-term reproduction [8,9]. Habitat quality is  
68 often inferred via habitat size, and larger habitats typically support larger groups due to  
69 the additional space and resources available for supporting more individuals and  
70 reducing conflict [15,5,16]. Lower ranking individuals may even forgo reproduction to  
71 reap the benefits of remaining in larger habitat [3,5].

72

73 While studies have focused primarily on the role of habitat size as a measure of quality  
74 [5,15,17,18], other parameters clearly dictate habitat quality and hence the degree of  
75 movement and sociality of animals. For social animals residing in living habitats, as is  
76 seen in shrimp inhabiting sponges [2], ants inhabiting plants [19], and fish inhabiting  
77 cnidarians [3], movement decisions may depend on the health of their 'host' habitat.  
78 Given that habitat degradation is occurring at an alarming rate due to environmental  
79 and anthropogenic disturbances [20,21], investigating the role of habitat health is  
80 necessary for a holistic understanding of how habitat promotes sociality [11].  
81 Understanding the interaction between habitat health, size, and saturation on the  
82 movement and sociality of habitat-specialists is especially important since threats of  
83 habitat degradation and mortality are increasing. Therefore, we urgently need to assess  
84 the interplay between multiple habitat factors on movement decisions in order to  
85 predict and potentially mitigate the social consequences of environmental degradation.

86  
87 Here we investigated how multiple ecological factors, namely habitat size, health, and  
88 saturation, influence sociality and movement decisions using a social coral-dwelling  
89 goby *Gobiodon quinquestrigatus* (Gobiidae) as our model species. Coral gobies provide  
90 an excellent model system since they reside within branches of living acroporid corals  
91 [22] and are site-attached even after coral bleaching [23]. *Gobiodon quinquestrigatus* are  
92 classified as facultatively social because group-living only occurs when coral hosts are  
93 large enough, whereas pair-forming occurs when corals are small [24]. Such facultative  
94 sociality is useful because it enables us to examine and manipulate the potential factors  
95 promoting group- over pair-formation. We completed an *in situ* manipulative  
96 experiment to test the predictions that gobies would prefer to move to: (1) healthier  
97 versus bleached/dead habitat, (2) larger habitat, and (3) habitats with smaller groups  
98 (less saturated) to improve breeding opportunities.

## 100 **Methods**

### 101 *Site location*

102 Experiments were completed on SCUBA during two trips (Sep-Nov 2018 and May-June  
103 2019) at four inshore reefs near Mahonia Na Dari Research and Conservation Centre in  
104 Kimbe Bay, West New Britain, Papua New Guinea (-5.42896°, 150.09695°).

### 105 *Experimental design*

106 We completed our study *in situ* by removing a goby from its home coral and  
107 translocating it into a dead coral that was situated adjacent to a live coral. To set up the  
108 experiments, dead corals of *Acropora kimbeensis* were opportunistically located on the  
109 reef. These dead corals were of two size categories: small (11.2-cm avg. diameter) and  
110 large (17.3-cm avg. diameter). We then randomly searched for similarly-sized live corals  
111 that contained *G. quinquestrigatus* individuals. To set up one trial, a dead coral was  
112 placed within 10 cm of the similarly-sized live coral (Fig 1, Suppl Fig 1a,b & 2). In  
113 neighbouring corals (within a 10-m radius), we then located a 'focal' *G. quinquestrigatus*  
114 individual that was smaller (16.9-mm avg. standard length, range: 12.2-22.5 mm) than  
115 gobies in the live coral (next to the dead coral). Selecting a smaller goby was important  
116 to reduce potential eviction by residents [18]. The focal goby was removed from its  
117 original home coral using a clove oil anaesthetic solution and hand nets [25] and  
118 injected with a unique visible implant elastomer identification tag (Northwest Marine  
119 Technology, Inc.) [22]. The focal goby was then translocated into the dead coral (Fig 1),  
120  
121  
122  
123

124 and we revisited trials daily for up to 7 days to determine where the focal goby  
125 subsequently moved.  
126

127 Since the dead coral was adjacent to the live coral, this gave the focal goby the choice of  
128 a dead or live coral (thereby examining the effect of habitat health). To simultaneously  
129 assess effects of habitat size, the dead and live corals were size-matched in each trial  
130 (small or large, Fig 1). In addition, to investigate the role of habitat saturation,  
131 treatments were carried out using both small and large coral sizes under three levels of  
132 habitat saturation (Fig 1): (i) no residents, (ii) one bigger conspecific, or (iii) two bigger  
133 conspecifics in the live coral. Accordingly, a total of six treatment combinations were  
134 trialled: three levels of habitat saturation for two levels of habitat size (Fig 1). Ten trials  
135 were completed per treatment combination, totalling sixty trials. For each trial, a  
136 different focal fish and live coral were used.  
137

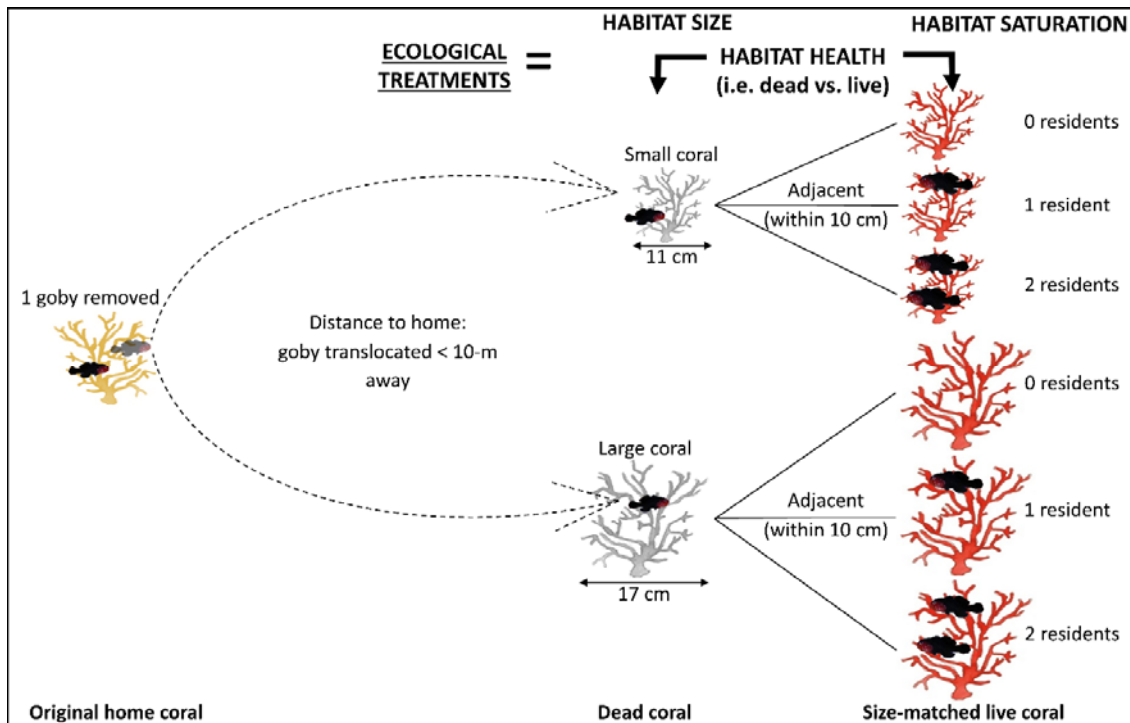

138 Fig 1. Experimental design: a focal goby was translocated into a dead coral adjacent to an unfamiliar live  
139 coral of similar size to offer two habitat health options: dead coral (grey) vs. live coral (red). Six treatment  
140 combinations were used to account for two habitat sizes and three habitat saturation levels.  
141

142  
143 To assess where the focal goby moved and whether any movement decisions were  
144 based on the level of saturation of neighbouring corals in the study plot, we surveyed all  
145 *Acropora* corals larger than 7-cm in diameter [26] within a 10-m radius from the dead  
146 coral in each trial. Additional covariables were recorded and accounted for in data  
147 analysis (see Suppl Methods).  
148

#### 149 *Data analysis*

150  
151 The effect of habitat health (live or dead) on the final location of focal gobies was  
152 compared using a chi-squared goodness-of-fit test with the null hypothesis that gobies  
153 would equally prefer dead and live corals. The effects of the six treatment combinations  
154 on the final location of the focal goby (i.e., in dead coral, in live coral, goby not located,  
155 returned to home coral) were compared using multinomial logistic regression models.  
156 Both habitat size (small or large) and habitat saturation (0, 1, or 2 residents) were

157 included as fixed factors along with the following covariables: distance to home coral,  
158 number of gobies in home coral, proportion of uninhabited corals within 10-m radius,  
159 and average group size of conspecifics in inhabited corals within 10-m radius. Recruits  
160 (distinguished from other life stages by distinct colour and markings, Hing et al. 2018)  
161 in the home coral were not included in analysis, because recruits often move between  
162 corals before settlement (Froehlich pers. obs. & [16]). The effect of movement costs on  
163 the probability of finding the focal goby (would be located [moved successfully] or no  
164 longer located [moved unsuccessfully]) was compared using a chi-squared goodness-of-  
165 fit test. Data analysis was completed in RStudio [27] with R v4.0.1 [28] packages: VGAM  
166 [29], car [30], tidyverse [31], and rcompanion [32].

167

## 168 Results

169

170 We completed 24 trials in 2018 and 36 trials in 2019 (total = 60 trials). Movement  
171 decisions of focal gobies were not dependent on habitat health ( $p < 0.001$ , see Suppl Tab  
172 1 for all statistical outputs, Fig 2), size ( $p = 0.93$ , Fig 2), or saturation ( $p = 0.88$ , Fig 2).  
173 None of the measured covariables were related to movement decisions ( $p > 0.12$ ).  
174

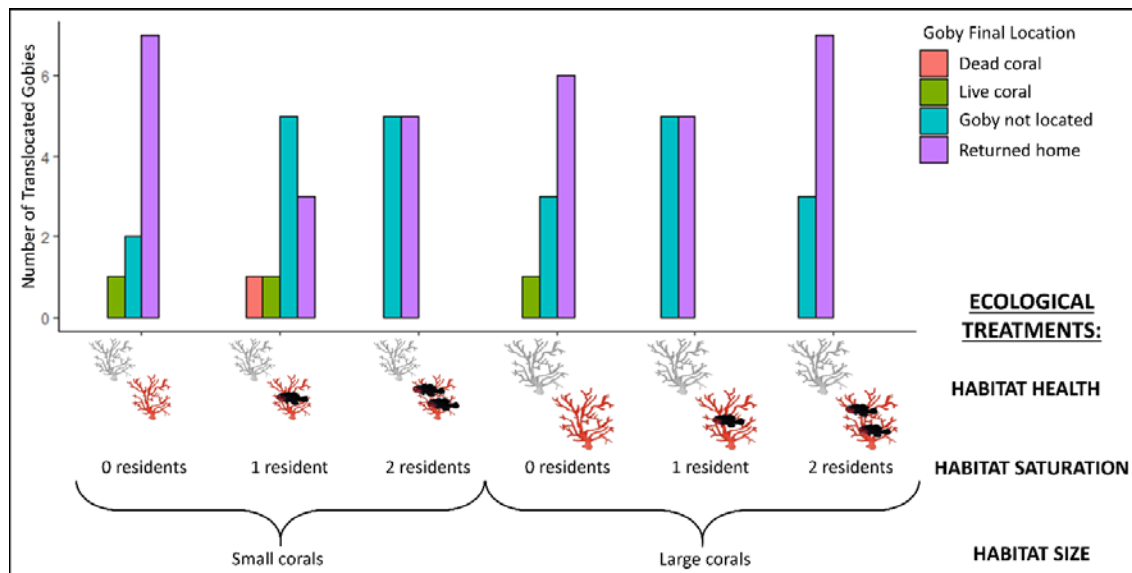

175

176 Fig 2. Frequency of gobies' final location in relation to habitat health (live/red coral or dead/grey coral),  
177 saturation and size.

178

179 Surprisingly, most focal gobies (93%,  $n = 56$ ) did not remain in the dead coral or move  
180 to the adjacent live coral. Only one goby stayed in the dead coral and three moved into  
181 the live coral (Fig 2). Instead, 55% of focal gobies ( $n = 33$ ) were located back in their  
182 home coral, which was up to 10-m away (Fig 3a). Gobies that returned home travelled  
183 between 0.6 to 9 m (Fig 3b). While most returned home within 1 day, some took up to 7  
184 days (Suppl Fig 3). The remaining 38% of gobies ( $n = 23$ ) could not be located anywhere  
185 in the dead coral, live coral, home coral, or in any of the corals within a 10-m radius.  
186 Overall, 33 individuals were located and 23 individuals were not located, despite  
187 thorough searches, suggesting that they did not survive and faced high costs of  
188 movement ( $p = 0.18$ ).  
189

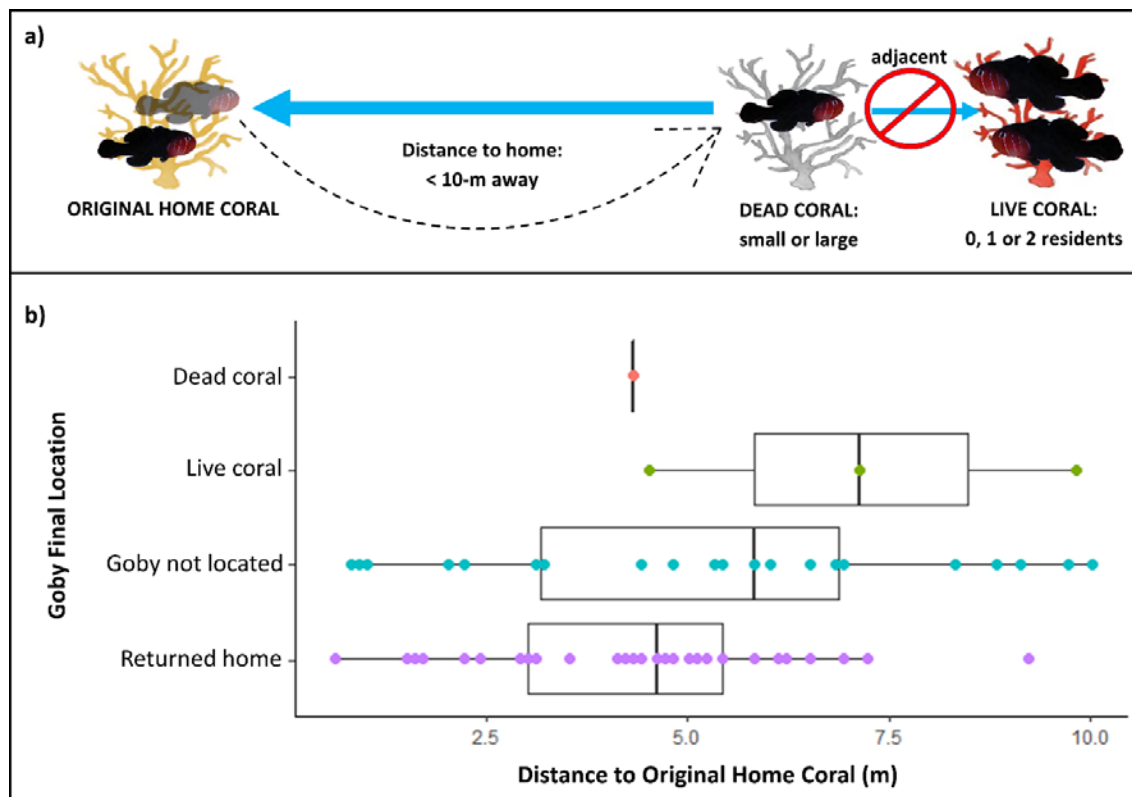

190  
191  
192  
193  
194  
195

Fig 3. **a** Most common outcome for coral gobies that were translocated into a dead coral away from their home coral (beige). Black dashed arrow represents translocation, blue arrows represent expected outcomes and the red circle crosses out the least popular outcome. **b** Final location of focal gobies in relation to the distance to travel and return to their home coral.

## 196 Discussion

197

198 By experimentally manipulating three ecological factors (habitat health, size,  
199 saturation), we simultaneously tested multiple components of two hypotheses of  
200 sociality: ecological constraints (costs of movement and habitat saturation) and benefits  
201 of philopatry (habitat health and size). Surprisingly, when these small-bodied fish were  
202 translocated up to 10-m away, they preferentially returned to their home coral instead  
203 of moving into an alternative live coral nearby (within 10 cm). This preference occurred  
204 despite high apparent costs of movement (38% chance of mortality). In contrast,  
205 movement decisions were not related to habitat health, size, and saturation,  
206 contradicting the hypothesized role of ecological factors on movement. Instead, these  
207 findings highlight an unsung role of habitat familiarity and benefits of homing in  
208 movement decisions and hence the maintenance of sociality in this social fish.

209

210 For other social reef fishes, previous studies have demonstrated that habitat factors  
211 influence the movement decisions of individuals, thereby promoting sociality [12,14].  
212 Numerous studies found positive correlations between habitat size and group size  
213 [16,24,33–36], demonstrating the important role of habitat in determining levels of  
214 sociality. In addition, habitat saturation influences dispersal and grouping decisions in  
215 the coral goby *Paragobiodon xanthosoma* [14] whereby individuals preferentially move  
216 to adjacent corals of low saturation (low risk of movement). Furthermore, since coral  
217 gobies and damselfishes only inhabit relatively healthy corals and leave highly degraded  
218 and dead corals [23,37–39], we expected coral health to influence movement decisions.  
219 However, the current study demonstrated that none of these habitat factors (size,  
220 saturation and health) influenced the movement of *G. quinquestrigatus*; instead, gobies

221 remarkably returned home even though i) they were often reinstated as nonbreeding  
222 subordinates at home, ii) there were opportunities to breed immediately in nearby  
223 corals that were healthy, large, and had low saturation, and iii) there were high costs of  
224 returning home due to the long distances and risks of predation.

225

226 Why do *G. quinquestrigatus* individuals face high costs of movement and return home  
227 when other social reef fish species, *P. xanthosoma* and *Amphiprion percula*, prefer  
228 instead to join alternative groups [12,14]? Homing ability has already been  
229 demonstrated in *G. histrio* [40], other cryptobenthic and reef fishes [41,42], suggesting  
230 broader benefits of homing. However, the anemonefish *A. percula* only homed when  
231 distances to travel home were small (0.5 m) and never when ecological constraints  
232 were heightened and travel distances reached 5 m [12]. Interestingly, even though *G.*  
233 *quinquestrigatus* are at least one third smaller than anemonefish, they preferred to  
234 home despite longer distances (up to 10 m) and high costs of movement (estimated  
235 38% mortality). Perhaps *G. quinquestrigatus* home due to the benefits of associating  
236 with familiar conspecifics, like in social damselfishes [43]. A well-established social  
237 hierarchy [12,44] means avoiding costs of re-establishing dominance, like immediate  
238 eviction and possible mortality from enhanced aggression by unfamiliar residents  
239 [18,45]. Importantly, since gobies in our study returned home even if they were the only  
240 one residing in that coral, there may be benefits of returning to a familiar host habitat,  
241 as seen in cardinalfishes [46]. Cardinalfishes move hundreds of meters daily and return  
242 to the same host, but host fidelity is more important than mate fidelity because new  
243 mates are common [46]. Gobies on the other hand, may move temporarily between  
244 corals as juveniles, but eventually select a particular host and never leave that coral  
245 [47]. This suggests that certain aspects of their particular coral habitat may enhance  
246 their fitness [22]. Thus, choosing an alternative host could be less advantageous than  
247 attempting to return to their familiar home coral.

248

249 Our results demonstrate that coral gobies are clearly specialized, not only to a particular  
250 type of habitat but also to specific habitats that they are familiar with. Such specificity  
251 might prove disadvantageous under conditions of rapid habitat degradation,  
252 particularly due to cyclones and bleaching [16,21,26], because maintaining plasticity in  
253 habitat utilization would enable these fish to reside in any habitat available following  
254 environmental disturbances [39]. Unlike other social fishes, however, *G.*  
255 *quinquestrigatus* opted to pay high costs of movement by returning to familiar corals  
256 rather than adopting other suitable corals nearby. Such interspecific differences may  
257 disproportionally alter the maintenance of sociality among species as their habitats are  
258 degrading at alarming rates. Since our study site was located on a relatively pristine reef  
259 system, perhaps the enhanced movement frequency of gobies reflects the overall reef  
260 condition. Hence, focal individuals may only restrict movements and adopt alternative  
261 habitat if their reef system is degraded. Further research investigating whether degrees  
262 of disturbance affect movement and grouping decisions would be important for  
263 predicting the impacts of environmental change on social species.

264

## 265 **Conclusions**

266

267 While habitat factors are thought to play an important role in sociality, here we show  
268 that habitat saturation, size and health do not influence the use of alternative hosts by  
269 coral gobies when their home habitats are still viable. Instead of forming new groups or  
270 inhabiting alternative corals of high quality, this social fish opts to swim long distances  
271 to return to their familiar home coral. These findings suggest that habitat, mate and/or

272 social group familiarity drives homing behaviour in coral gobies, which in turn is likely  
273 to influence the formation and maintenance of their social groups. Our findings  
274 therefore question how widely applicable the findings of pre-existing studies are on  
275 other social fishes. Future changes to reef environments due to climate change will  
276 likely alter the trade-offs of movement as their habitat becomes more fragmented and  
277 truncated, which raises doubts about the maintenance of sociality and persistence of  
278 populations under future conditions.

279

### 280 **Acknowledgements**

281

282 We are grateful to the local owners of the reefs: the Kilu and Tamare communities of  
283 Papua New Guinea. We thank Theresa Rueger, Nelson and Jerry Sikatura, Somei Jonda,  
284 Peter and Jane Miller, the Mahonia Na Dari Research and Conservation Centre, and the  
285 Walindi Plantation Resort for field assistance and site visitation.

286

### 287 **Funding**

288

289 The project was funded by a Sea World Research and Rescue Foundation grant to MW,  
290 and funding initiatives from the Centre for Sustainable Ecosystem Solutions at the  
291 University of Wollongong (UOW) to CF and MW. CF was supported by a University  
292 Postgraduate Award, and SH by an Australian Government Research Training Program  
293 Scholarship, both administered through UOW.

294

295 Animal Ethics: University of Wollongong AE1404 and AE1725. Papua New Guinea  
296 Research Visa Permit AA654347.

297

### 298 **Data Availability**

299

300 All data and statistical coding are available at the Knowledge Network for Biocomplexity  
301 repository with identifier: *doi:10.5063/D21W00*.



302 **References**

303

- 304 1. Faulkes CG, Bennett NC, Bruford MW, O'Brien HP, Aguilar GH, Jarvis JUM. 1997  
305 Ecological constraints drive social evolution in the African mole-rats. *Proc. R. Soc. B*  
306 *Biol. Sci.* **264**, 1619–1627. (doi:10.1098/rspb.1997.0226)
- 307 2. Duffy JE, Macdonald KS. 2010 Kin structure, ecology and the evolution of social  
308 organization in shrimp: a comparative analysis. *Proc. R. Soc. B Biol. Sci.* **277**, 575–  
309 584. (doi:10.1098/rspb.2009.1483)
- 310 3. Wong MYL, Buston PM. 2013 Social systems in habitat-specialist reef fishes: key  
311 concepts in evolutionary ecology. *BioScience* **63**, 453–463.  
312 (doi:10.1525/bio.2013.63.6.7)
- 313 4. Lassig B. 1976 Field observations on the reproductive behaviour of *Paragobiodon*  
314 spp. (Osteichthyes: Gobiidae) at Heron Island Great Barrier Reef. *Mar. Behav. Physiol.*  
315 **3**, 283–293. (doi:10.1080/10236247609378517)
- 316 5. Woolfenden GE, Fitzpatrick JW. 1978 The inheritance of territory in group-breeding  
317 birds. *BioScience* **28**, 104–108. (doi:10.2307/1307423)
- 318 6. Kokko H, Ekman J. 2002 Delayed dispersal as a route to breeding: territorial  
319 inheritance, safe havens, and ecological constraints. *Am. Nat.* **160**, 468–484.  
320 (doi:10.1086/342074)
- 321 7. Selander RK. 1964 Speciation in wrens of the genus *Campylorhynchus*. *Univ. Calif.*  
322 *Publ. Zool.* **74**, 1–259.
- 323 8. Emlen ST. 1982 The evolution of helping. I. an ecological constraints model. *Am. Nat.*  
324 **119**, 29–39. (doi:10.1086/283888)
- 325 9. Stacey PB, Ligon JD. 1991 The benefits-of-philopatry hypothesis for the evolution of  
326 cooperative breeding: variation in territory quality and group size effects. *Am. Nat.*  
327 **137**, 831–846. (doi:10.1086/285196)
- 328 10. Hing ML, Klanten OS, Downton M, Wong MYL. 2017 The right tools for the job:  
329 cooperative breeding theory and an evaluation of the methodological approaches to  
330 understanding the evolution and maintenance of sociality. *Front. Ecol. Evol.* **5**, 1–19.  
331 (doi:10.3389/fevo.2017.00100)
- 332 11. He P, Maldonado-Chaparro AA, Farine DR. 2019 The role of habitat configuration in  
333 shaping social structure: a gap in studies of animal social complexity. *Behav. Ecol.*  
334 *Sociobiol.* **73**. (doi:10.1007/s00265-018-2602-7)
- 335 12. Branconi R, Barbasch TA, Francis RK, Srinivasan M, Jones GP, Buston PM. 2020  
336 Ecological and social constraints combine to promote evolution of non-breeding  
337 strategies in clownfish. *Commun. Biol.* **3**. (doi:10.1038/s42003-020-01380-8)
- 338 13. Arnold KE, Owens IPE. 1998 Cooperative breeding in birds: a comparative test of the  
339 life history hypothesis. *Proc. R. Soc. Lond. B Biol. Sci.* **265**, 739–745.  
340 (doi:10.1098/rspb.1998.0355)

- 341 14. Wong MYL. 2010 Ecological constraints and benefits of philopatry promote group-  
342 living in a social but non-cooperatively breeding fish. *Proc. R. Soc. B Biol. Sci.* **277**,  
343 353–358. (doi:10.1098/rspb.2009.1453)
- 344 15. Parry V. 1973 The auxiliary social system and its effect on territory and breeding in  
345 Kookaburras. *Emu - Austral Ornithol.* **73**, 81–100. (doi:10.1071/MU973081)
- 346 16. Hing ML, Klanten OS, Dowton M, Brown KR, Wong MYL. 2018 Repeated cyclone  
347 events reveal potential causes of sociality in coral-dwelling *Gobiodon* fishes. *PLoS*  
348 *ONE* **13**, e0202407. (doi:10.1371/journal.pone.0202407)
- 349 17. Buston PM. 2004 Territory inheritance in clownfish. *Proc. R. Soc. B Biol. Sci.* **271**,  
350 S252–S254. (doi:10.1098/rsbl.2003.0156)
- 351 18. Wong MYL, Buston PM, Munday PL, Jones GP. 2007 The threat of punishment  
352 enforces peaceful cooperation and stabilizes queues in a coral-reef fish. *Proc. R. Soc.*  
353 *B Biol. Sci.* **274**, 1093–1099. (doi:10.1098/rspb.2006.0284)
- 354 19. Stapley L. 1999 Physical worker castes in colonies of an acacia-ant (*Crematogaster*  
355 *nigriceps*) correlated with an intra-colonial division of defensive behaviour. *Insectes*  
356 *Sociaux* **46**, 146–149. (doi:10.1007/s000400050125)
- 357 20. Turner MG. 2010 Disturbance and landscape dynamics in a changing world. *Ecology*  
358 **91**, 2833–2849. (doi:10.1890/10-0097.1)
- 359 21. Hughes TP *et al.* 2018 Spatial and temporal patterns of mass bleaching of corals in  
360 the Anthropocene. *Science* **359**, 80–83. (doi:10.1126/science.aan8048)
- 361 22. Munday PL. 2001 Fitness consequences of habitat use and competition among coral-  
362 dwelling fishes. *Oecologia* **128**, 585–593. (doi:10.1007/s004420100690)
- 363 23. Bonin MC, Munday PL, McCormick MI, Srinivasan M, Jones GP. 2009 Coral-dwelling  
364 fishes resistant to bleaching but not to mortality of host corals. *Mar. Ecol. Prog. Ser.*  
365 **394**, 215–222. (doi:10.3354/meps08294)
- 366 24. Hing ML, Klanten OS, Wong MYL, Dowton M. 2019 Drivers of sociality in *Gobiodon*  
367 fishes: an assessment of phylogeny, ecology and life-history. *Mol. Phylogenet. Evol.*  
368 **137**, 263–273. (doi:10.1016/j.ympev.2019.05.020)
- 369 25. Munday PL, Wilson SK. 1997 Comparative efficacy of clove oil and other chemicals  
370 in anaesthetization of *Pomacentrus amboinensis*, a coral reef fish. *J. Fish Biol.* **51**,  
371 931–938. (doi:10.1111/j.1095-8649.1997.tb01532.x)
- 372 26. Froehlich CYM, Klanten OS, Hing ML, Dowton M, Wong MYL. 2021 Uneven declines  
373 between corals and cryptobenthic fish symbionts from multiple disturbances.  
374 *bioRxiv* (doi:10.1101/2021.01.13.426488)
- 375 27. RStudio Team. 2020 RStudio: integrated development environment for R. *RStudio*  
376 *PBC.*, Boston, MA. <http://www.rstudio.com/>.
- 377 28. R Core Team. 2020 R: a language and environment for statistical computing. *R*  
378 *Found. Stat. Comput.*, Vienna, Austria. <https://www.R-project.org>.

- 379 29. Yee TW. 2010 The VGAM package for categorical data analysis. *J. Stat. Softw.* **32**, 1–  
380 34. (doi:10.18637/jss.v032.i10)
- 381 30. Fox J, Weisberg S. 2019 *An R companion to applied regression*. Third. Thousand Oaks,  
382 CA: Sage. See <https://socialsciences.mcmaster.ca/jfox/Books/Companion/>.
- 383 31. Wickham H *et al.* 2019 Welcome to the Tidyverse. *J. Open Source Softw.* **4**, 1686.  
384 (doi:10.21105/joss.01686)
- 385 32. Mangiafico S. 2016 *Summary and analysis of extension program evaluation in R*. New  
386 Brunswick, NJ: Rutgers Cooperative Extension. See [rcompanion.org/handbook/](http://rcompanion.org/handbook/).
- 387 33. Fautin DG. 1992 Anemonefish recruitment: the roles of order and chance. *Symbiosis*  
388 **14**, 143–160.
- 389 34. Wong MYL. 2011 Group size in animal societies: the potential role of social and  
390 ecological limitations in the group-living fish, *Paragobiodon xanthosomus*. *Ethology*  
391 **117**, 638–644. (doi:10.1111/j.1439-0310.2011.01913.x)
- 392 35. Chausson J, Srinivasan M, Jones GP. 2018 Host anemone size as a determinant of  
393 social group size and structure in the orange clownfish (*Amphiprion percula*). *PeerJ*  
394 **6**, e5841. (doi:10.7717/peerj.5841)
- 395 36. Barbasch TA, Rueger T, Srinivasan M, Wong MYL, Jones GP, Buston PM. 2020  
396 Substantial plasticity of reproduction and parental care in response to local  
397 resource availability in a wild clownfish population. *Oikos* **129**, 1844–55.  
398 (doi:10.1111/oik.07674)
- 399 37. Feary DA, Almany GR, McCormick MI, Jones GP. 2007 Habitat choice, recruitment  
400 and the response of coral reef fishes to coral degradation. *Oecologia* **153**, 727–737.  
401 (doi:10.1007/s00442-007-0773-4)
- 402 38. Feary DA. 2007 The influence of resource specialization on the response of reef fish  
403 to coral disturbance. *Mar. Biol.* **153**, 153–161. (doi:10.1007/s00227-007-0791-0)
- 404 39. Pratchett MS, Messmer V, Wilson SK. 2020 Size-specific recolonization success by  
405 coral-dwelling damselfishes moderates resilience to habitat loss. *Sci. Rep.* **10**, 17016.  
406 (doi:10.1038/s41598-020-73979-0)
- 407 40. Wall M, Herler J. 2009 Postsettlement movement patterns and homing in a coral-  
408 associated fish. *Behav. Ecol.* **20**, 87–95. (doi:10.1093/beheco/arn118)
- 409 41. White GE, Brown C. 2013 Site fidelity and homing behaviour in intertidal fishes. *Mar.*  
410 *Biol.* **160**, 1365–1372. (doi:10.1007/s00227-013-2188-6)
- 411 42. Streit RP, Bellwood DR. 2017 High prevalence of homing behaviour among juvenile  
412 coral-reef fishes and the role of body size. *Coral Reefs* **36**, 1083–1095.  
413 (doi:10.1007/s00338-017-1600-y)
- 414 43. Jordan LA, Avolio C, Herbert-Read JE, Krause J, Rubenstein DI, Ward AJW. 2010  
415 Group structure in a restricted entry system is mediated by both resident and joiner  
416 preferences. *Behav. Ecol. Sociobiol.* **64**, 1099–1106. (doi:10.1007/s00265-010-0924-  
417 1)

- 418 44. Griffiths SW, Brockmark S, Höjesjö J, Johnsson JI. 2004 Coping with divided  
419 attention: the advantage of familiarity. *Proc. R. Soc. B Biol. Sci.* **271**, 695–699.  
420 (doi:10.1098/rspb.2003.2648)
- 421 45. Wong M, Balshine S. 2011 Fight for your breeding right: hierarchy re-establishment  
422 predicts aggression in a social queue. *Biol. Lett.* **7**, 190–193.  
423 (doi:10.1098/rsbl.2010.0639)
- 424 46. Rueger T, Gardiner NM, Jones GP. 2018 Site fidelity facilitates pair formation in  
425 aggregations of coral reef cardinalfish. *Oecologia* **186**, 425–434.  
426 (doi:10.1007/s00442-017-4018-x)
- 427 47. Kuwamura T, Nakashima Y, Yogo Y. 1996 Plasticity in size and age at maturity in a  
428 monogamous fish: effect of host coral size and frequency dependence. *Behav. Ecol.*  
429 *Sociobiol.* **38**, 365–370. (doi:10.1007/s002650050253)
- 430
